# Supplementary material
Source: PubMed Central journal article supplement (PMC3624564)
Supplement: JB.02196-12_zjb999092525so1.pdf [file JB.02196-12_zjb999092525so1.pdf]

1 **TABLE S1.** Primers used in this study

| Primer       | Sequence (5'-3') <sup>a</sup>                          |
|--------------|--------------------------------------------------------|
| comS-uF      | CTCTCCCGTCTTTAGATAG                                    |
| comS-uRspec  | GAAAAATTCTATAGAACTTCTCTCAATTAGGCTCTATAGTACATATTTAACCC  |
| comS-dFspec  | TACAGATTAATAATTATTCTTTATTATACAGATCGAGCCATCATGCCAAAATG  |
| comS-dR      | ATTCACCAGTACGACG                                       |
| comS-uRerm   | CTACTGACAGCTTCCAAGGAGCTAAAGAGGTCCCCTATAGTACATATTTAACCC |
| comS-dFerm   | GCAAGTCAGCACGAACACGAACCGTCTTATCTCCGAGCCATCATGCCAAAATG  |
| PcomX-SpeI   | AACT <u>ACTAG</u> TCGTTAGATTTTTAGGCG                   |
| PcomX-EcoRI  | GAAGAATTCTCTTGTTCCATTGAACCTCC                          |
| PdprA-SpeI   | AACT <u>ACTAG</u> TAATTGCTGTTCTGATTC                   |
| PdprA- EcoRI | GAAGAATTCAAGTTATTCATCTAACTACC                          |
| ComS-NcoI    | CCAC <u>CATGGG</u> GAAAACCCTGAAAATATTTG                |
| ComS-PstI    | CCTG <u>CTGCAGG</u> GCATGATGGCTCCTTATTAAAG             |

2 <sup>a</sup>Restriction enzyme recognition sequences are underlined

Table S2. Peptides with a signaling function, imported by an oligopeptide transporter, and for which the amino-acid sequence of the mature form has been determined

| Name    | Bacterial species                 | Role                           | Encoded by  | Precursor size         | Mature peptide size | Mature sequence | Location of the mature form             | References |
|---------|-----------------------------------|--------------------------------|-------------|------------------------|---------------------|-----------------|-----------------------------------------|------------|
| cCF10   | <i>Enterococcus faecalis</i>      | Conjugation                    | Lipoprotein | Signal peptide (23 aa) | 7 aa                | LVTLVFV         | Internal fragment of the signal peptide | (1)        |
| PhrC    | <i>Bacillus subtilis</i>          | Sporulation/competence         | Short ORF   | 40 aa                  | 5 aa                | ERGMT           | C-terminal end                          | (2)        |
| PapR    | <i>Bacillus cereus</i>            | Virulence                      | Short ORF   | 48 aa                  | 7 aa                | ADLPFEF         | C-terminal end                          | (3)        |
| SHP1358 | <i>Streptococcus thermophilus</i> | Production of a cyclic peptide | Short ORF   | 23 aa                  | 9 aa                | EGIIIVIVVG      | C-terminal end                          | (4)        |
| ComS    | <i>Streptococcus mutans</i>       | Competence                     | Short ORF   | 17 aa                  | 7 aa                | GLDWWSL         | C-terminal end                          | (5)        |
| ComS    | <i>Streptococcus thermophilus</i> | Competence                     | Short ORF   | 24 aa                  | 11 aa               | IAILPYFAGCL     | C-terminal end                          | this work  |

#### References

1. **Mori M, Sakagami Y, Ishii Y, Isogai A, Kitada C, Fujino M, Adsit JC, Dunny GM, Suzuki A.** 1988. Structure of cCF10, a peptide sex pheromone which induces conjugative transfer of the *Streptococcus faecalis* tetracycline resistance plasmid, pCF10. *J. Biol. Chem.* **263**:14574-14578.
2. **Solomon JM, Lazazzera BA, Grossman AD.** 1996. Purification and characterization of an extracellular peptide factor that affects two different developmental pathways in *Bacillus subtilis*. *Genes Dev.* **10**:2014-2024.
3. **Bouillaut L, Perchat S, Arold S, Zorrilla S, Slamti L, Henry C, Gohar M, Declerck N, Lereclus D.** 2008. Molecular basis for group-specific activation of the virulence regulator PlcR by PapR heptapeptides. *Nucleic Acids Res.* **36**:3791-3801.
4. **Fleuchot B, Gitton C, Guillot A, Vidic J, Nicolas P, Besset C, Fontaine L, Hols P, Leblond-Bourget N, Monnet V, Gardan R.** 2011. Rgg proteins associated with internalized small hydrophobic peptides: a new quorum-sensing mechanism in streptococci. *Mol. Microbiol.* **80**:1102-1119.
5. **Khan R, Rukke HV, Ricomini Filho AP, Fimland G, Arntzen MO, Thiede B, Petersen FC.** 2012. Extracellular identification of a processed type II ComR/ComS pheromone of *Streptococcus mutans*. *J. Bacteriol.* **194**:3781-3788.
